# Supplementary figures and images for: Effect of B-NIPOx in Experimental Trypanosoma cruzi Infection in Mice
Source: MDPI journal article supplement (doi:10.3390/ijms24010333), 2022-12-25

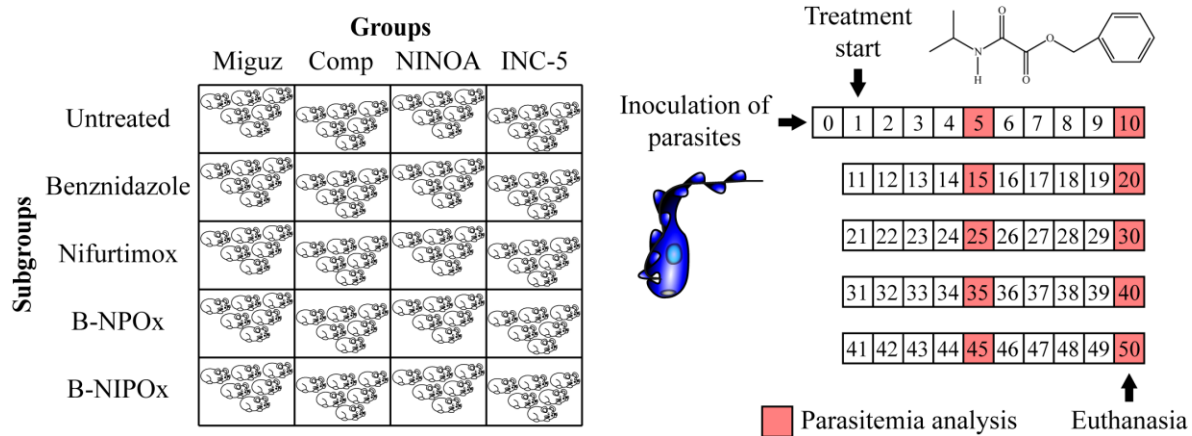

Figure S1: Experimental design in mice

Supplement: s1 [file s1]
